# Supplementary material for: An RNA-Seq based gene expression atlas of the common bean
Source: PubMed Central journal article supplement (PMC4195886; doi:10.1186/1471-2164-15-866), 2014-10-06

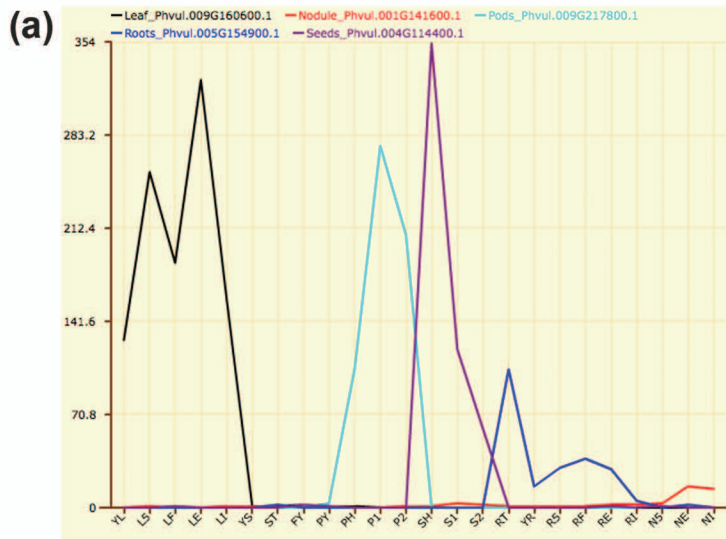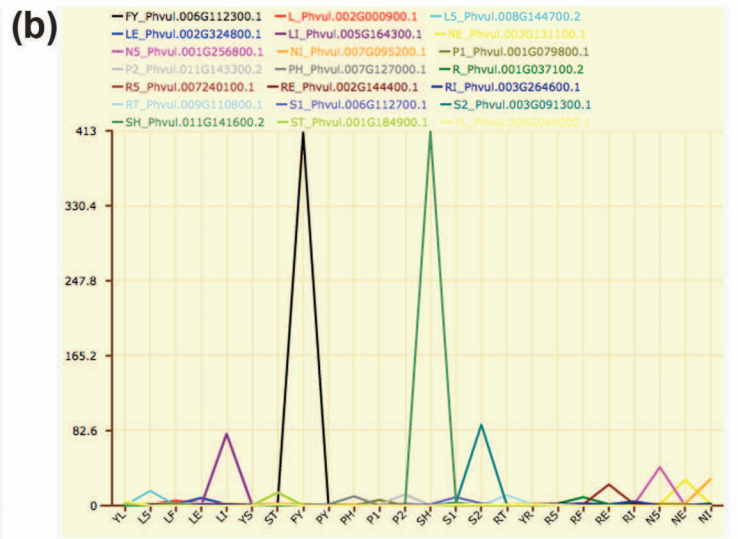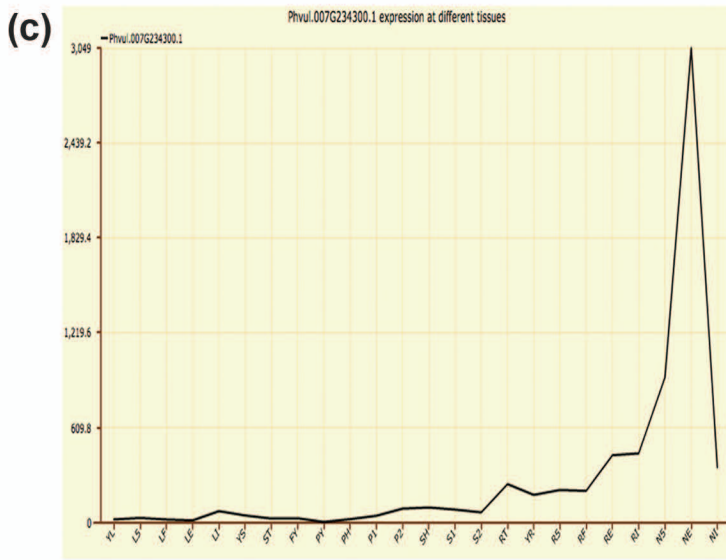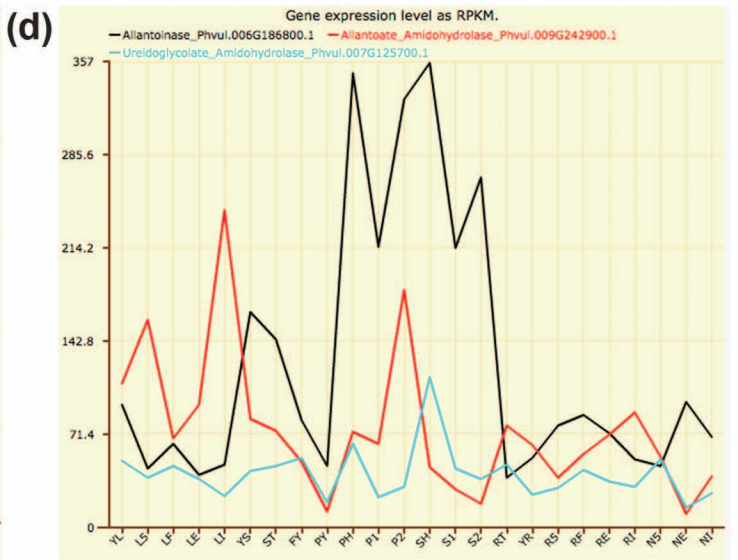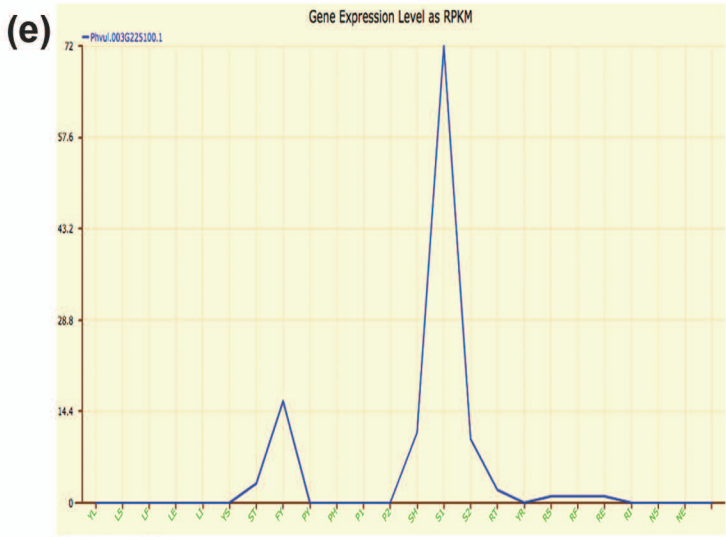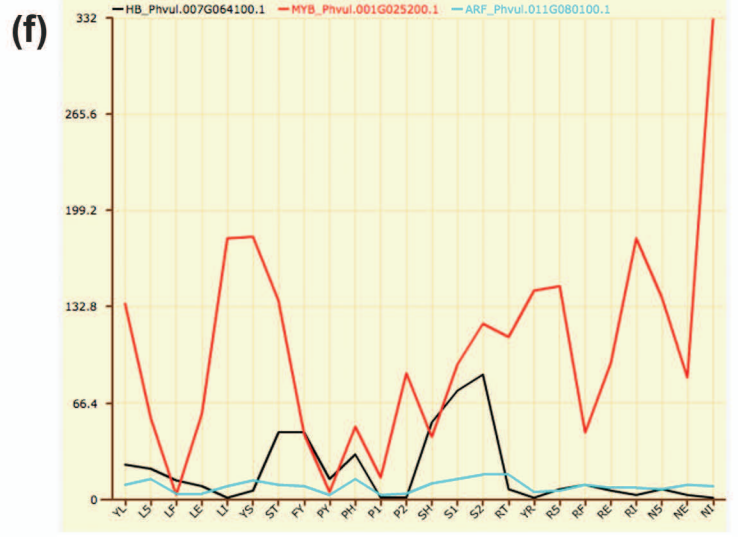

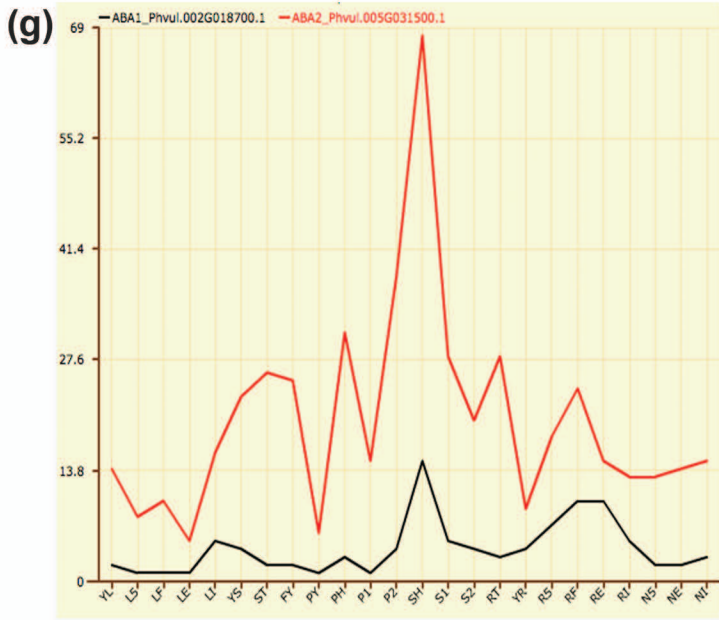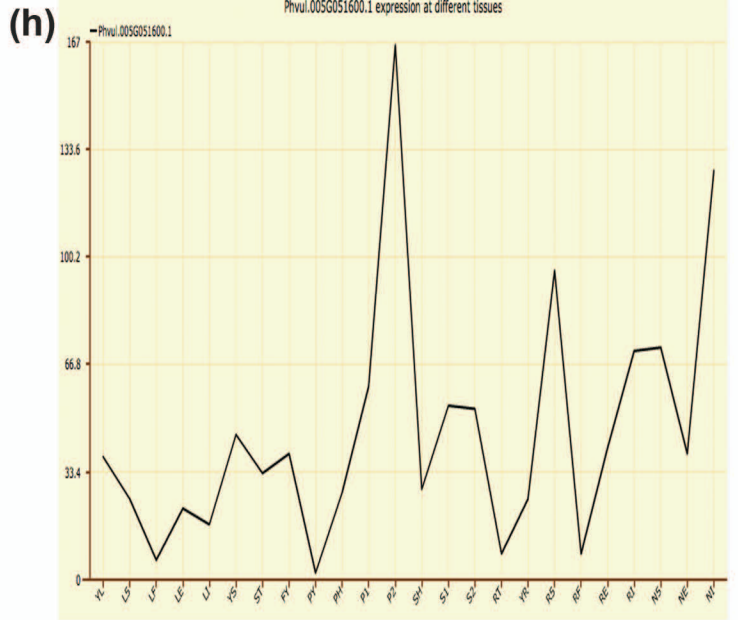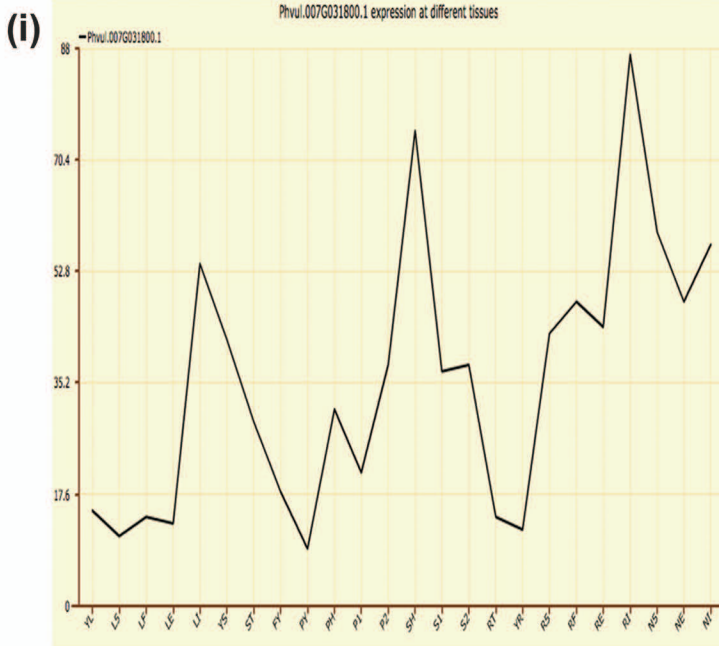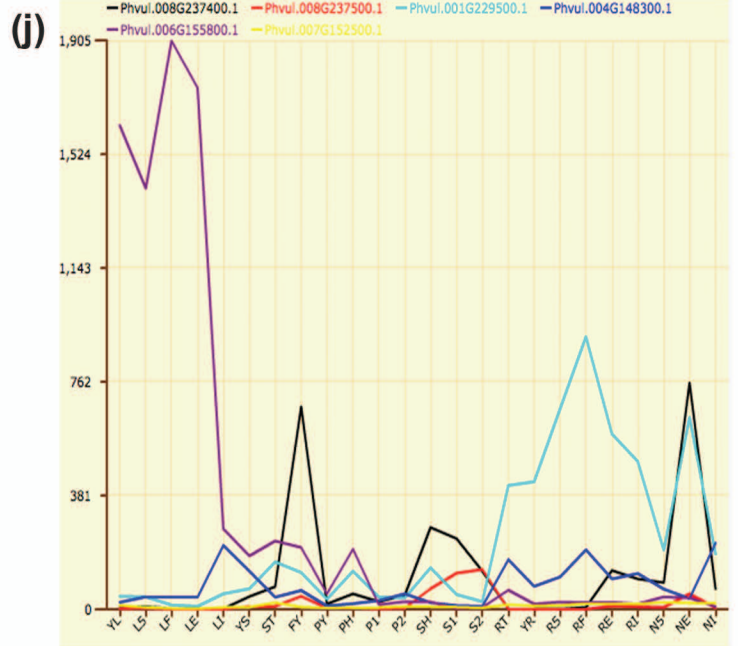

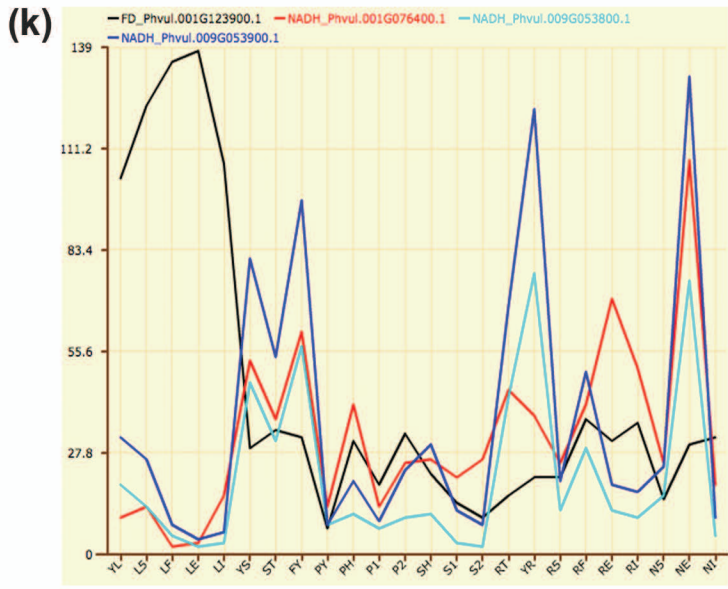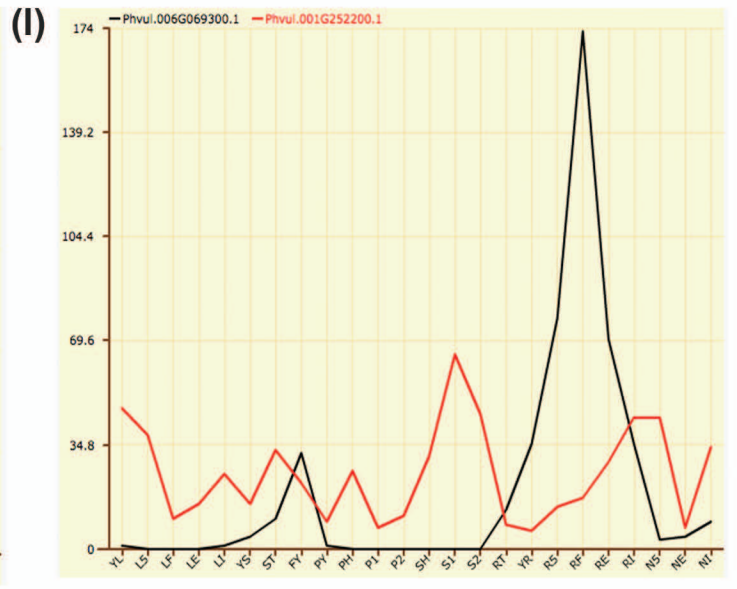

Supplement: 12864_2014_6531_MOESM3_ESM.pdf [file 12864_2014_6531_MOESM3_ESM.pdf]
